# Supplementary material for: Phosphorylation of the Chloroplastic Metalloprotease FtsH in Arabidopsis Characterized by Phos-Tag SDS-PAGE
Source: Front Plant Sci. 2019 Sep 10;10:1080. doi: 10.3389/fpls.2019.01080 (PMC6747001; doi:10.3389/fpls.2019.01080)
Supplement: Supplementary file 2 [file Table_1.xlsx]

## Sheet: table S1
Supplemental Table S1 Primers used in vector construction.
Primer mame	Sequence (5'-3')	Application
VAR2 Infusion-Fw	GGACTCTAGAGGATCATGGCAGCTTCATCAGCTTGTC	All vector construction and genotyping
VAR2 Infusion-Rv	GATCGGGGAAATTCGTTAGACAGCAGCTGGTGTTGGT	All vector construction and genotyping
VAR2 S212A-Fw	TTGGTCAGGCCAAAGCAAAGTTC	S212A
VAR2 S212A-Rv	CTTTGGCCTGACCAAACTGAAG	S212A
VAR2 T337A-Fw	GCCGGAATTGGTGGAGGTAA	T337A
VAR2 T337A-Rv	TCCACCAATTCCGGCTCCTC	T337A
VAR2 S380A-Fw	CTTGACGCTGCTTTGTTGAGG	S380A
VAR2 S380A-Rv	CAAAGCAGCGTCAAGAATGTCTG	S380A
VAR2 S393A-Fw	GTAGCTGTTGACGTTCCTGACGTT	S393A
VAR2 S393A-Rv	AACGTCAACAGCTACCTGCCG	S393A
